# Supplementary material for: PAUF Induces Migration of Human Pancreatic Cancer Cells Exclusively via the TLR4/MyD88/NF-κB Signaling Pathway
Source: MDPI journal article supplement (doi:10.3390/ijms231911414), 2022-09-27
Supplement: s1 [file s1]

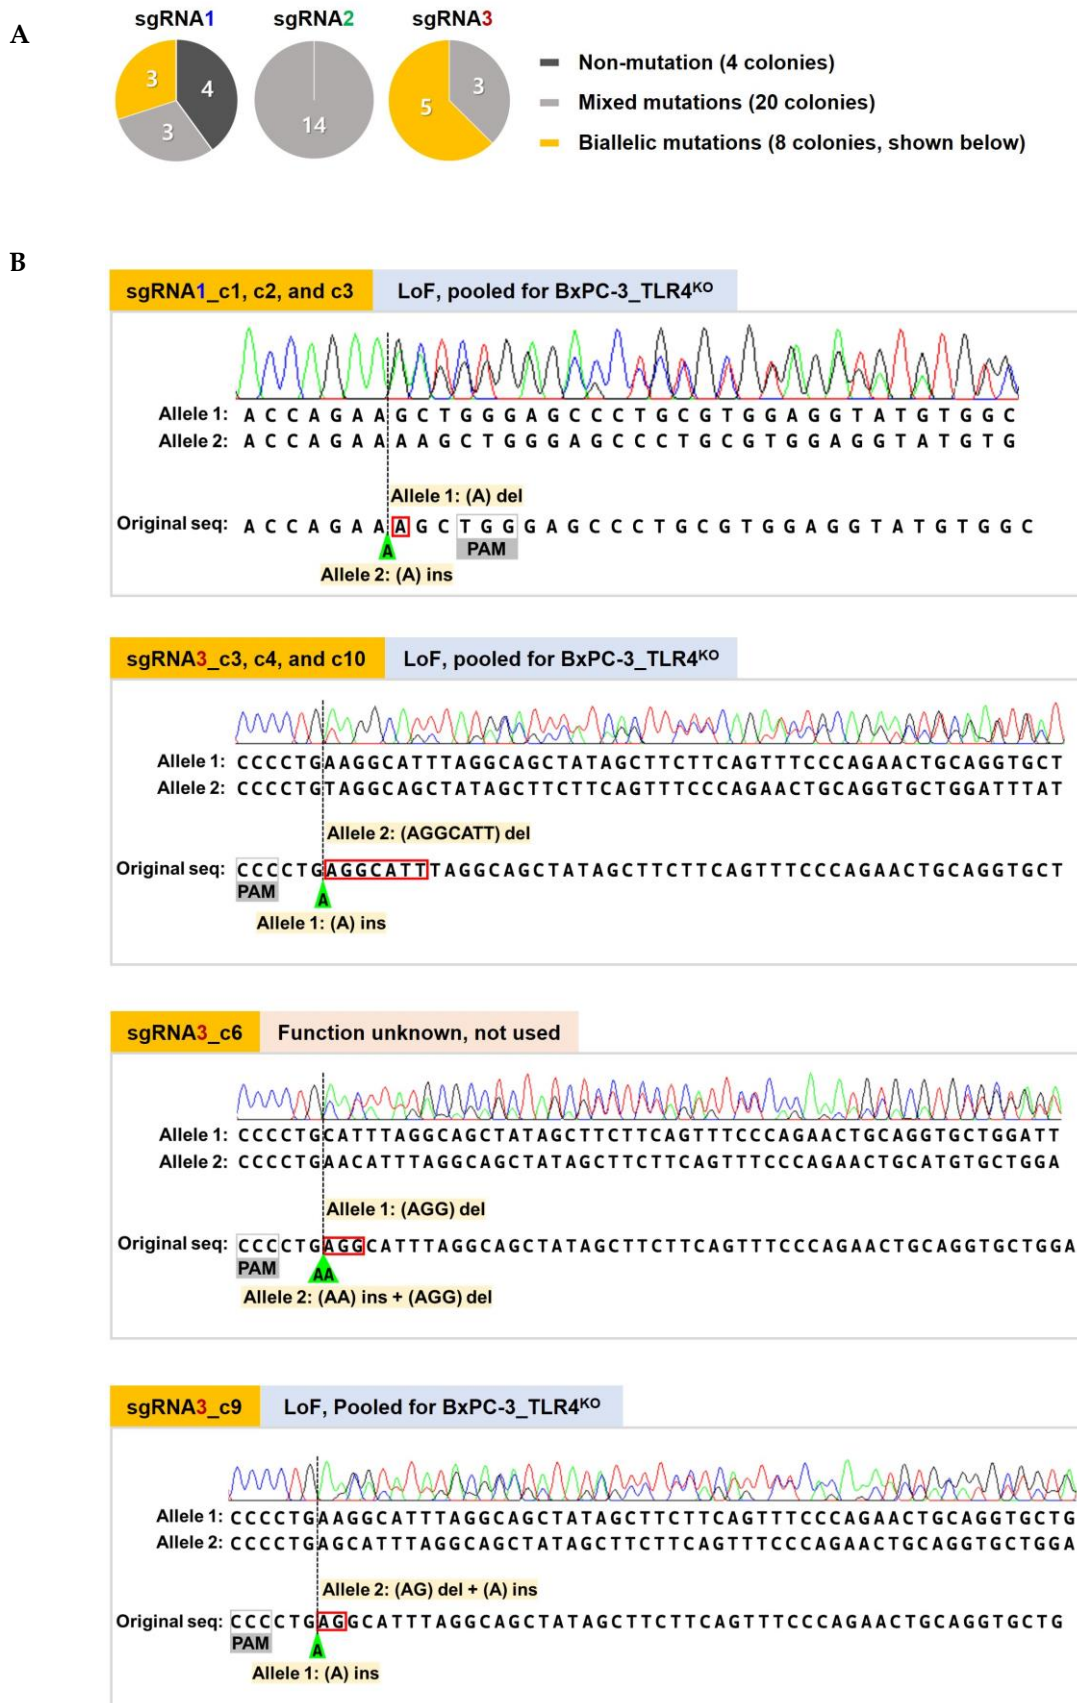

**Supplementary Figure S1.** Eight single clones with biallelic mutations in the TLR4 gene were obtained. (A) A total of thirty-two single colonies were picked after BxPC-3 cells were transfected with TLR4 sgRNA1, sgRNA2, or sgRNA3, which have either non-mutation, or mixed mutations, or biallelic mutations. (B) Sanger sequencing results of eight single clones with biallelic mutations. Dash line indicates 3 bp upstream of protospacer adjacent motif (PAM) site. LoF = loss-of-function; del = deletion; ins = insertion.

★ Stop Codon

### sgRNA1\_c1, c2, and c3

| Allele 1: (A) del |            |            |            |            |             | Allele 2: (A) ins |            |            |            |            |            |
|-------------------|------------|------------|------------|------------|-------------|-------------------|------------|------------|------------|------------|------------|
| 1                 | MMSASRLAGT | LIPAMAFISC | VRPEAGSPAW | RWFLILLINA | WS*ISTKSPT  | 1                 | MMSASRLAGT | LIPAMAFISC | VRPEKLGALR | GCGS*YYLSM | HGAEFQONPR |
| 51                | TSFSPQRIWT | *ALIP*GI*A | AIASSVQNC  | RCWYFGVKS  | RQLKMGHIRA  | 51                | QPFLLNQEPG | FEL*SPFAFR | QL*LLQFPRT | AGAGFIQV*N | PDN*RWGISE |
| 101               | *ATSLP*Y*Q | ETPSRV*PWE | PFLDYQVYRS | WNLWROI*HL | *RTSPLODISK | 101               | KPFPYLYNID | RKHPHEFSPG | SLFWTIKFTF | AGCGGDKSSI | SRELPHWTSQ |
| 151               | L*KNMLWLT  | LSNLSNYLSI | FLI*PI*STW | TFPAIRFKVF | IAQTGCGFIK  | 151               | NFERT*CGSQ | SYPIFQIT*V | FF*SDQSRA  | GPFQQQDSKY | LLHRLAGSTS |
| 201               | CPYSISL*TC | P*TL*TLNQ  | VHLKKGFI   | *L*EILIV*  | M**KLVPKVV  | 201               | NAFTQSLFRP | VPEPELYPT  | RCI*RN*AS* | ADFKK*F**F | KCNENLYSRS |
| 251               | LV*KSIVWFV | ENLEKETWK  | SLTNLL*AC  | AI*PLKNSD* | HT*TTTSMIL  | 251               | GWFRSPSPGS | GRI*K*RKLG | KV*QICSRG  | VQFDH*RIPI | SILRLLR*Y  |
| 301               | LYLIV*QMF  | LHFF*V*LL  | KG*KTFLIIS | DGNI*N*LTV | NLDSFPH*NS  | 301               | Y*LI*LFDKC | FFIFPGECDY | *KGRFL*F   | RMATFRIS*L | *IWTVSHIET |
| 351               | NLSKGLLSLP | TKVGMFLQKL | IYQALSF*IS | VEMA*VSKVA | VLKVLGQPA   | 351               | QISQKAYFHF | QORWECFFRS | *STKP*VSRS | *QKWFQRL   | LFSK*FWDNQ |
| 401               | *SI*I*ASMV | LLP*VQTSWA | *NN*NIWISS | IPI*NK*VSF | QYSYHSETSF  | 401               | PKVFRSELQW | CYHEFKLLG  | LRTTRISGFF | AFQFETNE*V | FSIPITQKPH |
| 451               | TLTFLILTPF | LLSMASMAC  | PVSKS*KWLA | ILSRKTSFOI | SSQS*ET*PS  | 451               | LP*HFSYSHQ | SCFQWHLQWL | VQSRSLENGW | QFFPGKLPSP | YLHRAEKLDL |
| 501               | WTSLSVNWSS | CLQQLHTSP  | VERY*I*ATT | TSFHWIRFLI | SV*TPSRFLI  | 501               | PGPLSVSTGA | VVNSI*LT   | QSSGTYKFP  | QLLFGYVSL  | *VSELPPGS* |
| 551               | TVSIT*LPK  | NRNYSIFQV  | *LS*ILLRMT | LLVLNTRVS  | CNGSRTRGSS  | 551               | LQSQSHNDFO | KTGTATFSK* | SSFLKSYSE* | LCLYL*TPF  | PAMDQGEAA  |
| 601               | WWKLNENWVQ | HLQISRACLC | *V*ISPVRI  | RPSLVCSSV  | CL*YLL*QW   | 601               | LQGS*INGMC | NTR*AGHAC  | AEFEYHLSDE | *DHHWCVPQ  | CACISCCSSS |
| 651               | SISSIFT*CF | LLAA*SMVEV | KTSMMLLST  | QARMRTG*GM | S**RI*KKGC  | 651               | GL*VLFSPDA | SCWLHKVW*R | *KHL*CLCYL | LKPG*GLGKE | *ASKEFRRRG |
| 701               | LHFFSAFTTE | TLFPVWPLP  | TSSMKVSIKA | ER*LLWCPST | SSRAAGVSLN  | 701               | ASISALPSLQ | RLYSRCGHCC | QHHP*RFK   | PKGDCCGVPA | LHPEPLVYL* |
| 751               | MRLLRPGSF* | AVVLVSSSL  | CRWRRCPSG  | SRWCTAFSA  | GTLTWSGRTV  | 751               | I*DCSDLAS  | EQSCWYHLC  | PAEGGEDPAQ | AAGGAVPSPQ | QEHLPVGGQ  |
| 801               | SWGTTSSGDD | SEKPCWMVNH | GIQKEQWVDQ | AIGRKQHL   |             | 801               | CPGAHLLT   | TQKSPAGW*I | MESRRNSGYR | MLAGSNITL  |            |

### sgRNA3\_c3, c4, and c10

| Allele 1: (A) ins |            |            |            |            |            |  |  |  |  | Allele 2: (AGCATT) del |              |             |             |             |            |  |  |  |  |
|-------------------|------------|------------|------------|------------|------------|--|--|--|--|------------------------|--------------|-------------|-------------|-------------|------------|--|--|--|--|
| 1                 | MMSASRLAGT | LIPAMAFISC | VRPEWEPVCV | EVVFNITYQC | MELNFYKIPD |  |  |  |  | 1                      | MMSASRLAGT   | LIPAMAFISC  | VRPEWEPVCV  | EVVFNITYQC  | MELNFYKIPD |  |  |  |  |
| 51                | NLPFSTKNLD | LSFNPLKAFR | QL*LLQFPRT | AGAGFIQV*N | PDN*RWGISE |  |  |  |  | 51                     | NLPFSTKNLD   | LSFNPLAAI   | AIASSVQNCRC | WYIPGVKSRQ  | LKMGHIRA*A |  |  |  |  |
| 101               | KPFPYLYNID | RKPHPEFSPG | SLFWTIKFTF | AGCGGDKSSI | SRELPHWTSQ |  |  |  |  | 101                    | TSPL*Y*QET   | PSRV*PWEFF  | LDYQVYRSWW  | LWROI*HL*R  | TSPLDISK*  |  |  |  |  |
| 151               | NFERT*CGSQ | SYPIFQIT*V | FF*SDQSRA  | GPFQQQDSKY | LLHRLAGSTS |  |  |  |  | 151                    | KNLMLWLTIS   | LSNLSNYLSIF | I*PI*STWTF  | PATRFKRVFIA | QTGCGFIKCP |  |  |  |  |
| 201               | NAFTQSLFRP | VPEPELYPT  | RCI*RN*AS* | ADFKK*F**F | KCNENLYSRS |  |  |  |  | 201                    | YISL*TCF*TL  | TL*TLNQVH   | LKKGFI*LS   | *EILIV*M*   | *KLVPKVVLL |  |  |  |  |
| 251               | GWFRSPSPGS | GRI*K*RKLG | KV*QICSRG  | VQFDH*RIPI | SILRLLR*Y  |  |  |  |  | 251                    | *KSIVMFWN    | ENLEKMTKWSL | TNLL*ACAI   | *PLKNSD*H   | *TTTSMIL   |  |  |  |  |
| 301               | Y*LI*LFDKC | FFIFPGECDY | *KGRFL*F   | RMATFRIS*L | *IWTVSHIET |  |  |  |  | 301                    | LYLIV*QMF    | FLP*V*LLKG  | *KTLFISLD   | N*H*LTVNL   | DSFFH*NSNL |  |  |  |  |
| 351               | QISQKAYFHF | QORWECFFRS | *STKE*VSRS | *QKWFQRL   | LFSK*FWDNQ |  |  |  |  | 351                    | SKGLLSLPTK   | VGMLFQKLIY  | QALSF*ISVE  | MA*VSKVAVL  | KVLGQPA*S  |  |  |  |  |
| 401               | PKVFRSELQW | CYHEFKLLG  | LRTTRISGFF | AFQETNE*V  | FSIPITQKPH |  |  |  |  | 401                    | I*I*ASVLL    | P*VQTSWA*N  | *NN*NIWISS  | I*KN*VSFOY  | SYHSETSFTL |  |  |  |  |
| 451               | LP*HFSYSHQ | SCFQWHLQWL | VQSRSLENGW | QFFPGKLPSP | YLHRAEKL   |  |  |  |  | 451                    | TLTFLITPELL  | SSMASSMACPV | SKS*KWLAIL  | SKRTSFOISS  | QS*ET*PSWT |  |  |  |  |
| 501               | PGPLSVSTGA | VVNSI*LT   | QSSGTYKFP  | QLLFGYVSL  | *VSELPPGS* |  |  |  |  | 501                    | SLSVNWSSCL   | QQLHTSPVF   | RY*I*ATTIS  | FWIRFLISV   | *TPSRFLITV |  |  |  |  |
| 551               | LQSQSHNDFO | KTGTAFSK*  | SSFLKSYSE* | LCLYL*TPF  | PAMDQGEAA  |  |  |  |  | 551                    | SIT**LPKNR   | NYISIFQV*V  | S*ILLRMTL   | VLNTRVSCN   | GSRTGSSWW  |  |  |  |  |
| 601               | LQGS*INGMC | NTR*AGHAC  | AEFEYHLSDE | *DHHWCVPQ  | CACISCCSSS |  |  |  |  | 601                    | KLNENWVQHL   | QISRACLC*   | *ISPVRI     | SLVCRSSVCL  | *YLL*QWFSI |  |  |  |  |
| 651               | GL*VLFSPDA | SCWLHKVW*R | *KHL*CLCYL | LKPG*GLGKE | *ASKEFRRRG |  |  |  |  | 651                    | SISSIFT*CFLL | AA*SMVEVKT  | SMMPLLSQAR  | RMRTG*GMS*  | *RI*KKGCLH |  |  |  |  |
| 701               | ASISALPSLQ | RLYSRCGHCC | QHHP*RFK   | PKGDCCGVPA | LHPEPLVYL* |  |  |  |  | 701                    | FSSAFTTETL   | FLPVWPLP    | TSMASSMAC   | *LLWCPST    | SSRAAGVSLN |  |  |  |  |
| 751               | I*DCSDLA   | EQSCWYHLC  | PAEGGEDPAQ | AAGGAVPSPQ | QEHLPVGGQ  |  |  |  |  | 751                    | LLRPGSF*AV   | VLVSSSLSCR  | RRWRRCPSGR  | WSCTAFSAGT  | LWTSGRVTSW |  |  |  |  |
| 801               | CPGAHLLT   | TQKSPAGW*I | MESRRNSGYR | MLAGVNSITL |            |  |  |  |  | 801                    | GGTSSGDDSE   | KPCQWVNHGI  | QKEQWQDAI   | GRKQHL      |            |  |  |  |  |

### sgRNA3\_c6

| Allele 1: (AGG) del |            |            |             |            |            | Allele 2: (AA) ins + (AGG) del |             |            |             |             |             |
|---------------------|------------|------------|-------------|------------|------------|--------------------------------|-------------|------------|-------------|-------------|-------------|
| 1                   | MMSASRLAGT | LIPAMAFISC | VRPESWPCV   | EVVFNITYQC | MELNFYKIPD | 1                              | MMSASRLAGT  | LIPAMAFISC | VRPESWPCV   | EVVFNITYQC  | MELNFYKIPD  |
| 51                  | NLPFSTKNLD | LSFNPLHLGS | YSFSSFPFELQ | VLDSRCEIQ  | TIEGAYQSL  | 51                             | NLPFSTKNLD  | LSFNPL*AAI | AIASSVQNCRC | WYIPGVKSRQ  | LKMGHIRA    |
| 101                 | SHLSTLITLG | NPQSLALGA  | FSGLSLQKL   | VAVETNLASL | ENFPIGHLKT | 101                            | *ATSLP*Y*Q  | ETPSRV*PWE | PFLDYQVYRS  | WNLWROI*HL  | *RTSPLODISK |
| 151                 | LKELNVAHNL | IQSKFLPEYF | SNLTNLEHLD  | LSNKSQISYI | CTDLRVLHQM | 151                            | L*KNLMLWLT  | LSNLSNYLSI | FLI*PI*STW  | TFPAIRFKVF  | IAQTGCGFIK  |
| 201                 | PLNLSLSDLS | LNPMWFIQPG | AFKEIRLHKL  | TLRNNFDSLN | VMKTCIQGLA | 201                            | CPYSISL*TC  | P*TL*TLNQ  | VHLKKGFI    | *L*EILIV*   | M**KLVPKVV  |
| 251                 | GLEVHRLVGL | EFNRGNLEK  | FQSALEGLC   | NLTIEEFRIA | YLDYVLDIOI | 251                            | LV*KSIVWFV  | ENLEKETWK  | SLTNLL*AC   | AI*PLKNSD*  | HT*TTTSMIL  |
| 301                 | DLFNCLTNVS | SFSLVSYTIE | RVKDFSYNFG  | WQHLVLNCK  | FGQFFTLKLL | 301                            | LYTLVL*QMF  | LHFF*V*LL  | KG*KTFLIIS  | DGNI*N*LTV  | NLDSFPH*NS  |
| 351                 | SKRLTLFTSN | KGNAFSEVD  | LPSLELDLS   | RNGLSFKGCG | SQSDGTITSL | 351                            | NLSKGLLSLP  | TKVGMFLQKL | IYQALSF*IS  | VEMA*VSKVA  | VLKVLGQPA   |
| 401                 | KYLDLSFNGV | ITMSNFIPLG | EQLEHLDFOH  | SNLQMSFES  | VFLSLRNLIY | 401                            | *SI*I*ASMV  | LLP*VQTSWA | *NN*NIWISS  | IPI*PNK*VSF | QYSYHSETSF  |
| 451                 | LDISHTHTRV | AFNGFINGLS | SEVLKMGAN   | SQGFENLFDI | FTELRLNFTL | 451                            | TLTFLITLTPF | LLSMASMAC  | PVSKS*KWLA  | ILSRKTSFOI  | SSQS*ET*PS  |
| 501                 | DLSQOGLQEL | SPTAFNSLSS | LQVLNMSHNN  | FFSLDTFFPK | CLNLSQVLDY | 501                            | WTSLSVNWSS  | CLQQLHSP   | VERY*I*ATT  | TSFHWIRFLI  | SV*TPSRFLI  |
| 551                 | SLNHMTSKK  | QELQHFFSSL | AFNLNTONDF  | ACTCEHQSLF | QWIKDQRL   | 551                            | TVSIT*LPK   | NRNYSIFQV  | *LS*ILLRMT  | LLVLNTRVS   | CNGSRTRGSS  |
| 601                 | VEVERMECAT | PSDKQGMVPL | SLNITCOMNK  | TIIGVSVLVS | LVVSVAVVLV | 601                            | WWKLNENWVQ  | HLQISRACLC | *V*ISPVRI   | RPSLVCSSV   | CL*YLL*QW   |
| 651                 | YKFYFHLMLL | AGCIKYGRGE | NIYDAFVYS   | SQDEDMVRNE | LVNLEEGVVP | 651                            | SISSIFT*CF  | LLAA*SMVEV | KTSMMLLST   | QARMRTG*GM  | S**RI*KKGC  |
| 701                 | FPOLCIHYRD | FIPGVAAIAN | IIHEGFHKS   | KVIVVVSQHS | IQSRWCIFEY | 701                            | LHFFSAATTE  | TLFPVWPLP  | TSSMKVSIKA  | ER*LLWCPST  | SSRAAGVSLN  |
| 751                 | EIAQTWQFLS | SRAGIITFVL | QVETKILLRQ  | QVELYRLLSR | NTYLEWEDSV | 751                            | MRLLRPGSF*  | AVVLVSSSL  | CRWRRCPSG   | SRWCTAFSA   | GTLTWSGRTV  |
| 801                 | LGRHIFWRL  | RKALLDGKSW | NFEGTVGTGC  | NWQEATSI*  |            | 801                            | SWGTTSSGDD  | SEKPCWMVNH | GIQKEQWVDQ  | AIGRKQHL    |             |

### sgRNA3\_c9

| Allele 1: (A) ins |            |            |            |            |            | Allele 2: (AG) del + (A) ins |             |            |             |            |             |
|-------------------|------------|------------|------------|------------|------------|------------------------------|-------------|------------|-------------|------------|-------------|
| 1                 | MMSASRLAGT | LIPAMAFISC | VRPEWEPVCV | EVVFNITYQC | MELNFYKIPD | 1                            | MMSASRLAGT  | LIPAMAFISC | VRPEWEPVCV  | EVVFNITYQC | MELNFYKIPD  |
| 51                | NLPFSTKNLD | LSFNPLKA   | QL*LLQFPRT | AGAGFIQV*N | PDN*RWGISE | 51                           | NLPFSTKNLD  | LSFNPL*AAI | AIASSVQNCRC | WYIPGVKSRQ | LKMGHIRA*A  |
| 101               | KPFPYLYNID | RKPHPEFSPG | SLFWTIKFTF | AGCGGDKSSI | SRELPHWTSQ | 101                          | *ATSLP*Y*Q  | ETPSRV*PWE | PFLDYQVYRS  | WNLWROI*HL | *RTSPLODISK |
| 151               | NFERT*CGSQ | SYPIFQIT*V | FF*SDQSRA  | GPFQQQDSKY | LLHRLAGSTS | 151                          | L*KNLMLWLT  | LSNLSNYLSI | FLI*PI*STW  | TFPAIRFKVF | IAQTGCGFIK  |
| 201               | NAFTQSLFRP | VPEPELYPT  | RCI*RN*AS* | ADFKK*F**F | KCNENLYSRS | 201                          | CPYSISL*TC  | P*TL*TLNQ  | VHLKKGFI    | *L*EILIV*  | M**KLVPKVV  |
| 251               | GWFRSPSPGS | GRI*K*RKLG | KV*QICSRG  | VQFDH*RIPI | SILRLLR*Y  | 251                          | LV*KSIVWFV  | ENLEMETWK  | SLTNLL*AC   | AI*PLKNSD* | HT*TTTSMIL  |
| 301               | Y*LI*LFDKC | FFIFPGECDY | *KGRFL*F   | RMATFRIS*L | *IWTVSHIET | 301                          | LYLIV*QMF   | LHFF*V*LL  | KG*KTFLIIS  | DGNI*N*LTV | NLDSFPH*NS  |
| 351               | QISQKAYFHF | QORWECFFRS | *STKP*VSRS | *QKWFQRL   | LFSK*FWDNQ | 351                          | NLSKGLLSLP  | TKVGMLFQKL | IYQALSF*IS  | VEMA*VSKVA | VLKVLGQPA   |
| 401               | PKVFRSELQW | CYHEFKLLG  | LRTTRISGFF | AFQFETNE*V | FSIPITQKPH | 401                          | *SI*I*ASMV  | LLP*VQTSWA | *NN*NIWISS  | IPI*NK*VSF | QYSYHSETSF  |
| 451               | LP*HFSYSHQ | SCFQWHLQWL | VQSRSLENGW | QFFPGKLPSP | YLHRAEKL   | 451                          | TLTFLITLTPF | LLSMASMAC  | PVSKS*KWLA  | ILSRKTSFOI | SSQS*ET*PS  |
| 501               | PGPLSVSTGA | VVNSI*LT   | QSSGTYKFP  | QLLFGYVSL  | *VSELPPGS* | 501                          | WTSLSVNWSS  | CLQQLTHSP  | VERY*I*ATT  | TSFHWIRFLI | SV*TPSRFLI  |
| 551               | LQSQSHNDFO | KTGTAFSK*  | SSFLKSYSE* | LCLYL*TPF  | PAMDQGEAA  | 551                          | TVSIT*LPK   | NRNYSIFQV  | *LS*ILLRMT  | LLVLNTRVS  | CNGSRTRGSS  |
| 601               | LQGS*INGMC | NTR*AGHAC  | AEFEYHLSDE | *DHHWCVPQ  | CACISCCSSS | 601                          | WWKLNENWVQ  | HLQISRACLC | *V*ISPVRI   | RPSLVCSSV  | CL*YLL*QW   |
| 651               | GL*VLFSPDA | SCWLHKVW*R | *KHL*CLCYL | LKPG*GLGKE | *ASKEFRRRG | 651                          | SISSIFT*CF  | LLAA*SMVEV | KTSMMLLST   | QARMRTG*GM | S**RI*KKGC  |
| 701               | ASISALPSLQ | RLYSRCGHCC | QHHP*RFK   | PKGDCCGVPA | LHPEPLVYL* | 701                          | LHFFSAFTTE  | TLFPVWPLP  | TSSMKVSIKA  | ER*LLWCPST | SSRAAGVSLN  |
| 751               | I*DCSDLA   | EQSCWYHLC  | PAEGGEDPAQ | AAGGAVPSPQ | QEHLPVGGQ  | 751                          | MRLLRPGSF*  | AVVLVSSSL  | CRWRRCPSG   | SRWCTAFSA  | GTLTWSGRTV  |
| 801               | CPGAHLLT   | TQKSPAGW*I | MESRRNSGYR | MLAGSNITL  |            | 801                          | SWGTTSSGDD  | SEKPCWMVNH | GIQKEQWVDQ  | AIGRKQHL   |             |

**Supplementary Figure S2.** Prediction of amino acid sequences of the eight single clones with biallelic mutations in the TLR4 gene using Vector NTI software. Highlighted parts show stop codon (denoted by asterisk \*) caused by the mutations. In sgRNA3\_c6, the AGG deletion in allele 1 resulted in one amino acid deletion of TLR4 rather than premature translation termination. del = deletion; ins = insertion.



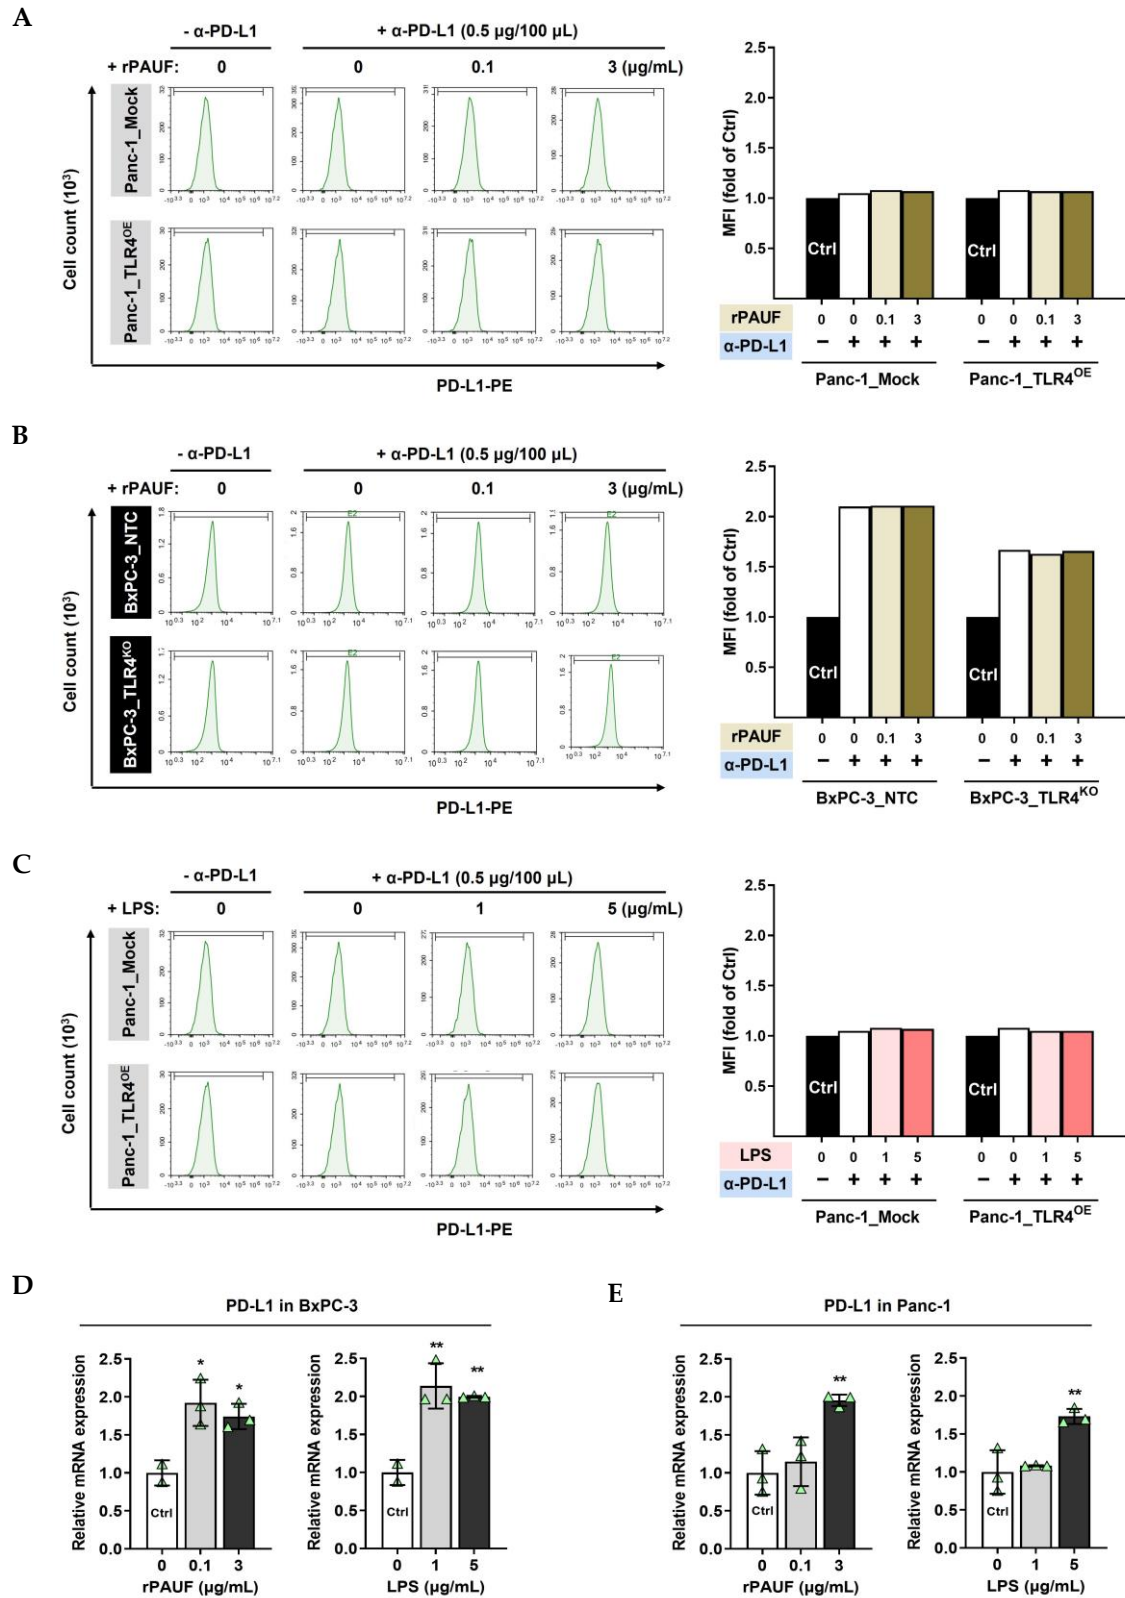

**Supplementary Figure S3.** rPAUF does not impact cell surface PD-L1 expression, but increases PD-L1 expression in cytoplasm, of pancreatic cancer cells. And PD-L1 expression in cells with higher basal surface PD-L1 expression (BxPC-3>>Panc-1), is more sensitive to TLR4 activity change. Flow cytometry showed cell surface PD-L1 expression in (A) Panc-1\_Mock and Panc-1\_TLR4OE cells, and in (B) BxPC-3\_NTC and BxPC-3\_TLR4KO cells, after the cells were treated by 0, 0.1, or 3  $\mu$ g/mL of rPAUF for 24 hr, and in (C) Panc-1\_Mock and Panc-1\_TLR4OE cells after cells were treated by 0, 1, or 5  $\mu$ g/mL of LPS for 24 hr. mRNA expression of PD-L1 in (D) BxPC-3 and (E) Panc-1 cells, after the cells were treated by rPAUF (0, 0.1, or 3  $\mu$ g/mL) or LPS (0, 1, or 5  $\mu$ g/mL) for 6 hr.
